# Supplementary material for: Use of the Secreted Proteome of Trametes versicolor for Controlling the Cereal Pathogen Fusarium langsethiae
Source: MDPI journal article supplement (doi:10.3390/ijms20174167), 2019-08-26
Supplement: s1 [file s1]

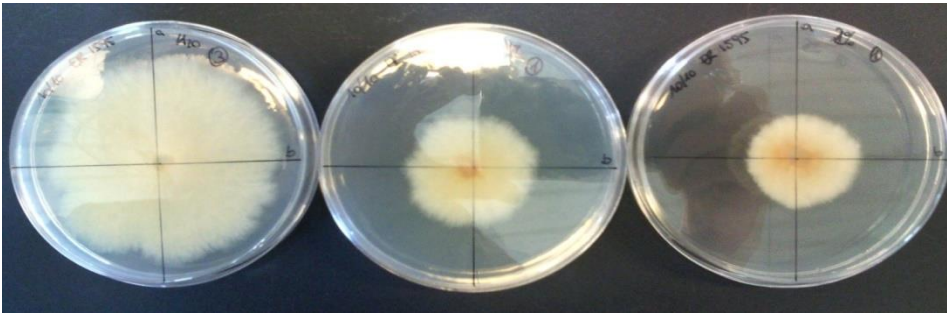

**Figure S1.** Growth inhibition assay of *F. langsethiae* (ER 1595) in presence of CF TV117. Petri dish non treated with CF on the left, in the middle and on the right Petri dishes treated with 0.04 % and 0.08 % (w/v) of CF TV117.

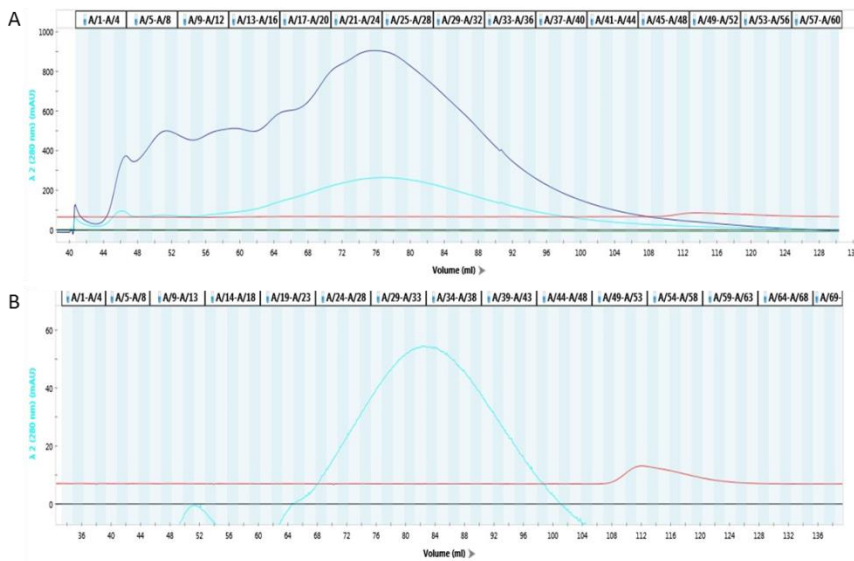

**Figure S2:** Sephacryl S-100 analysis of fractions : A, F75; B, F90.

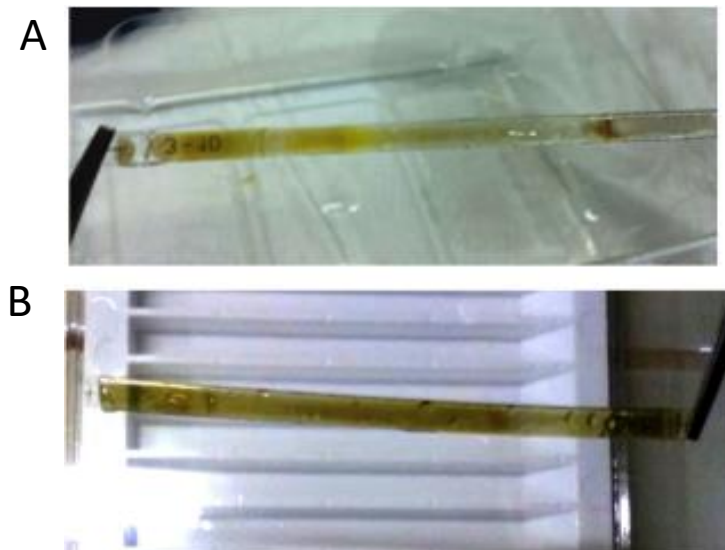

**Figure S3:** isoelectric focusing of the fractions F75\_7 and F90\_4, as example for determining the isoelectric point pI. The area with marked color indicates the regions where the proteins are positioned in the strip.

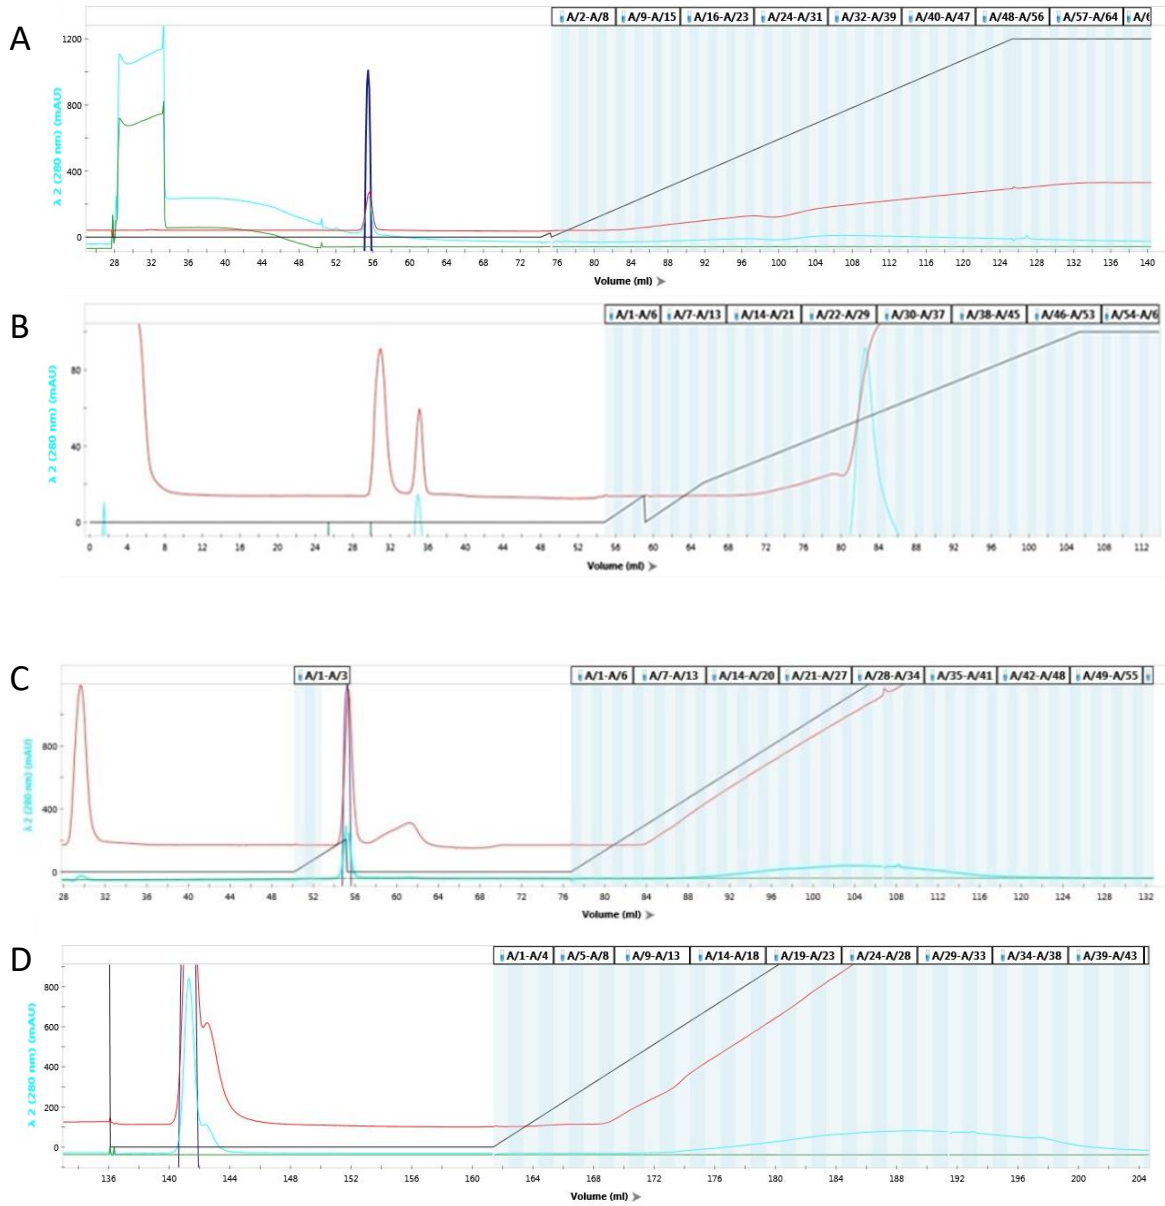

**Figure S4:** Chromatogram obtained from the HiTrap Q analysis of the fraction F75\_7 (A), F90\_2 (B), F90\_4 (C), F90\_5 (D).
